# Supplementary material for: Comparative transcriptome analysis of a long-time span two-step culture process reveals a potential mechanism for astaxanthin and biomass hyper-accumulation in Haematococcus pluvialis JNU35
Source: PubMed Central journal article supplement (PMC6348685; doi:10.1186/s13068-019-1355-5), 2019-01-28

**Table S7** Primers for genes validated by Quantitative real-time PCR (qPCR)

| <b>Genes</b> | <b>Unigene ID</b> | <b>Primer</b> | <b>Sequence (5'–3')</b>  | <b>Product size (bp)</b> |
|--------------|-------------------|---------------|--------------------------|--------------------------|
| DXS          | Unigene7019_A     | DXS -F        | TAAGACGGGCGGCCACTTGA     | 112                      |
|              |                   | DXS -R        | CTGGTGGCCCACATCCCAGA     |                          |
| HDR          | CL6996.Contig1_A  | HDR-F         | TCCCTAGGCAGCACCACCCT     | 167                      |
|              |                   | HDR-R         | GGCCTGAAGACGCGTAGCGA     |                          |
| FDPS         | Unigene23365      | FDPS -F       | CTCCAAGCCTGATGCCTAGATTGC | 116                      |
|              |                   | FDPS -R       | CCACACTGAGCCAGCGAATAGC   |                          |
| GGPS         | Unigene30715_A    | GGPS -F       | CCTCATGGAATCAACCAGCACCTC | 159                      |
|              |                   | GGPS -R       | GTCTCAGCCGTAGCAACAGCAG   |                          |
| PSY          | CL4515.Contig1_A  | PSY-F         | TGCCACTCTCCACCTATTCCACTC | 199                      |
|              |                   | PSY-R         | CCAGCAGCAGGCGACTTGTATG   |                          |
| CrtZ         | Unigene20243_A    | CrtZ-F        | GGCGAGATGCCTTGGAGCGA     | 165                      |
|              |                   | CrtZ-R        | AAAAGGTCCGGTGCGGGGAG     |                          |
| BKT1         | Unigene11485_A    | BKT1-F        | CTGTCCGCCTTCCGCTTGTTT    | 161                      |
|              |                   | BKT1-R        | AGGTCGAAGTGGTAGCAGGTCAG  |                          |
| BKT2         | CL7868.Contig1_A  | BKT2-F        | AGGTTGGGCAGAGCACGGAG     | 148                      |
|              |                   | BKT2-R        | AGTTCACGCGGGGCAACTCA     |                          |
| actin        | CL9171.Contig4_A  | Actin-F       | ACACCCGAGATCCCCACGGT     | 166                      |
|              |                   | Actin-R       | AGCGAACCCGGCTTTCACCA     |                          |

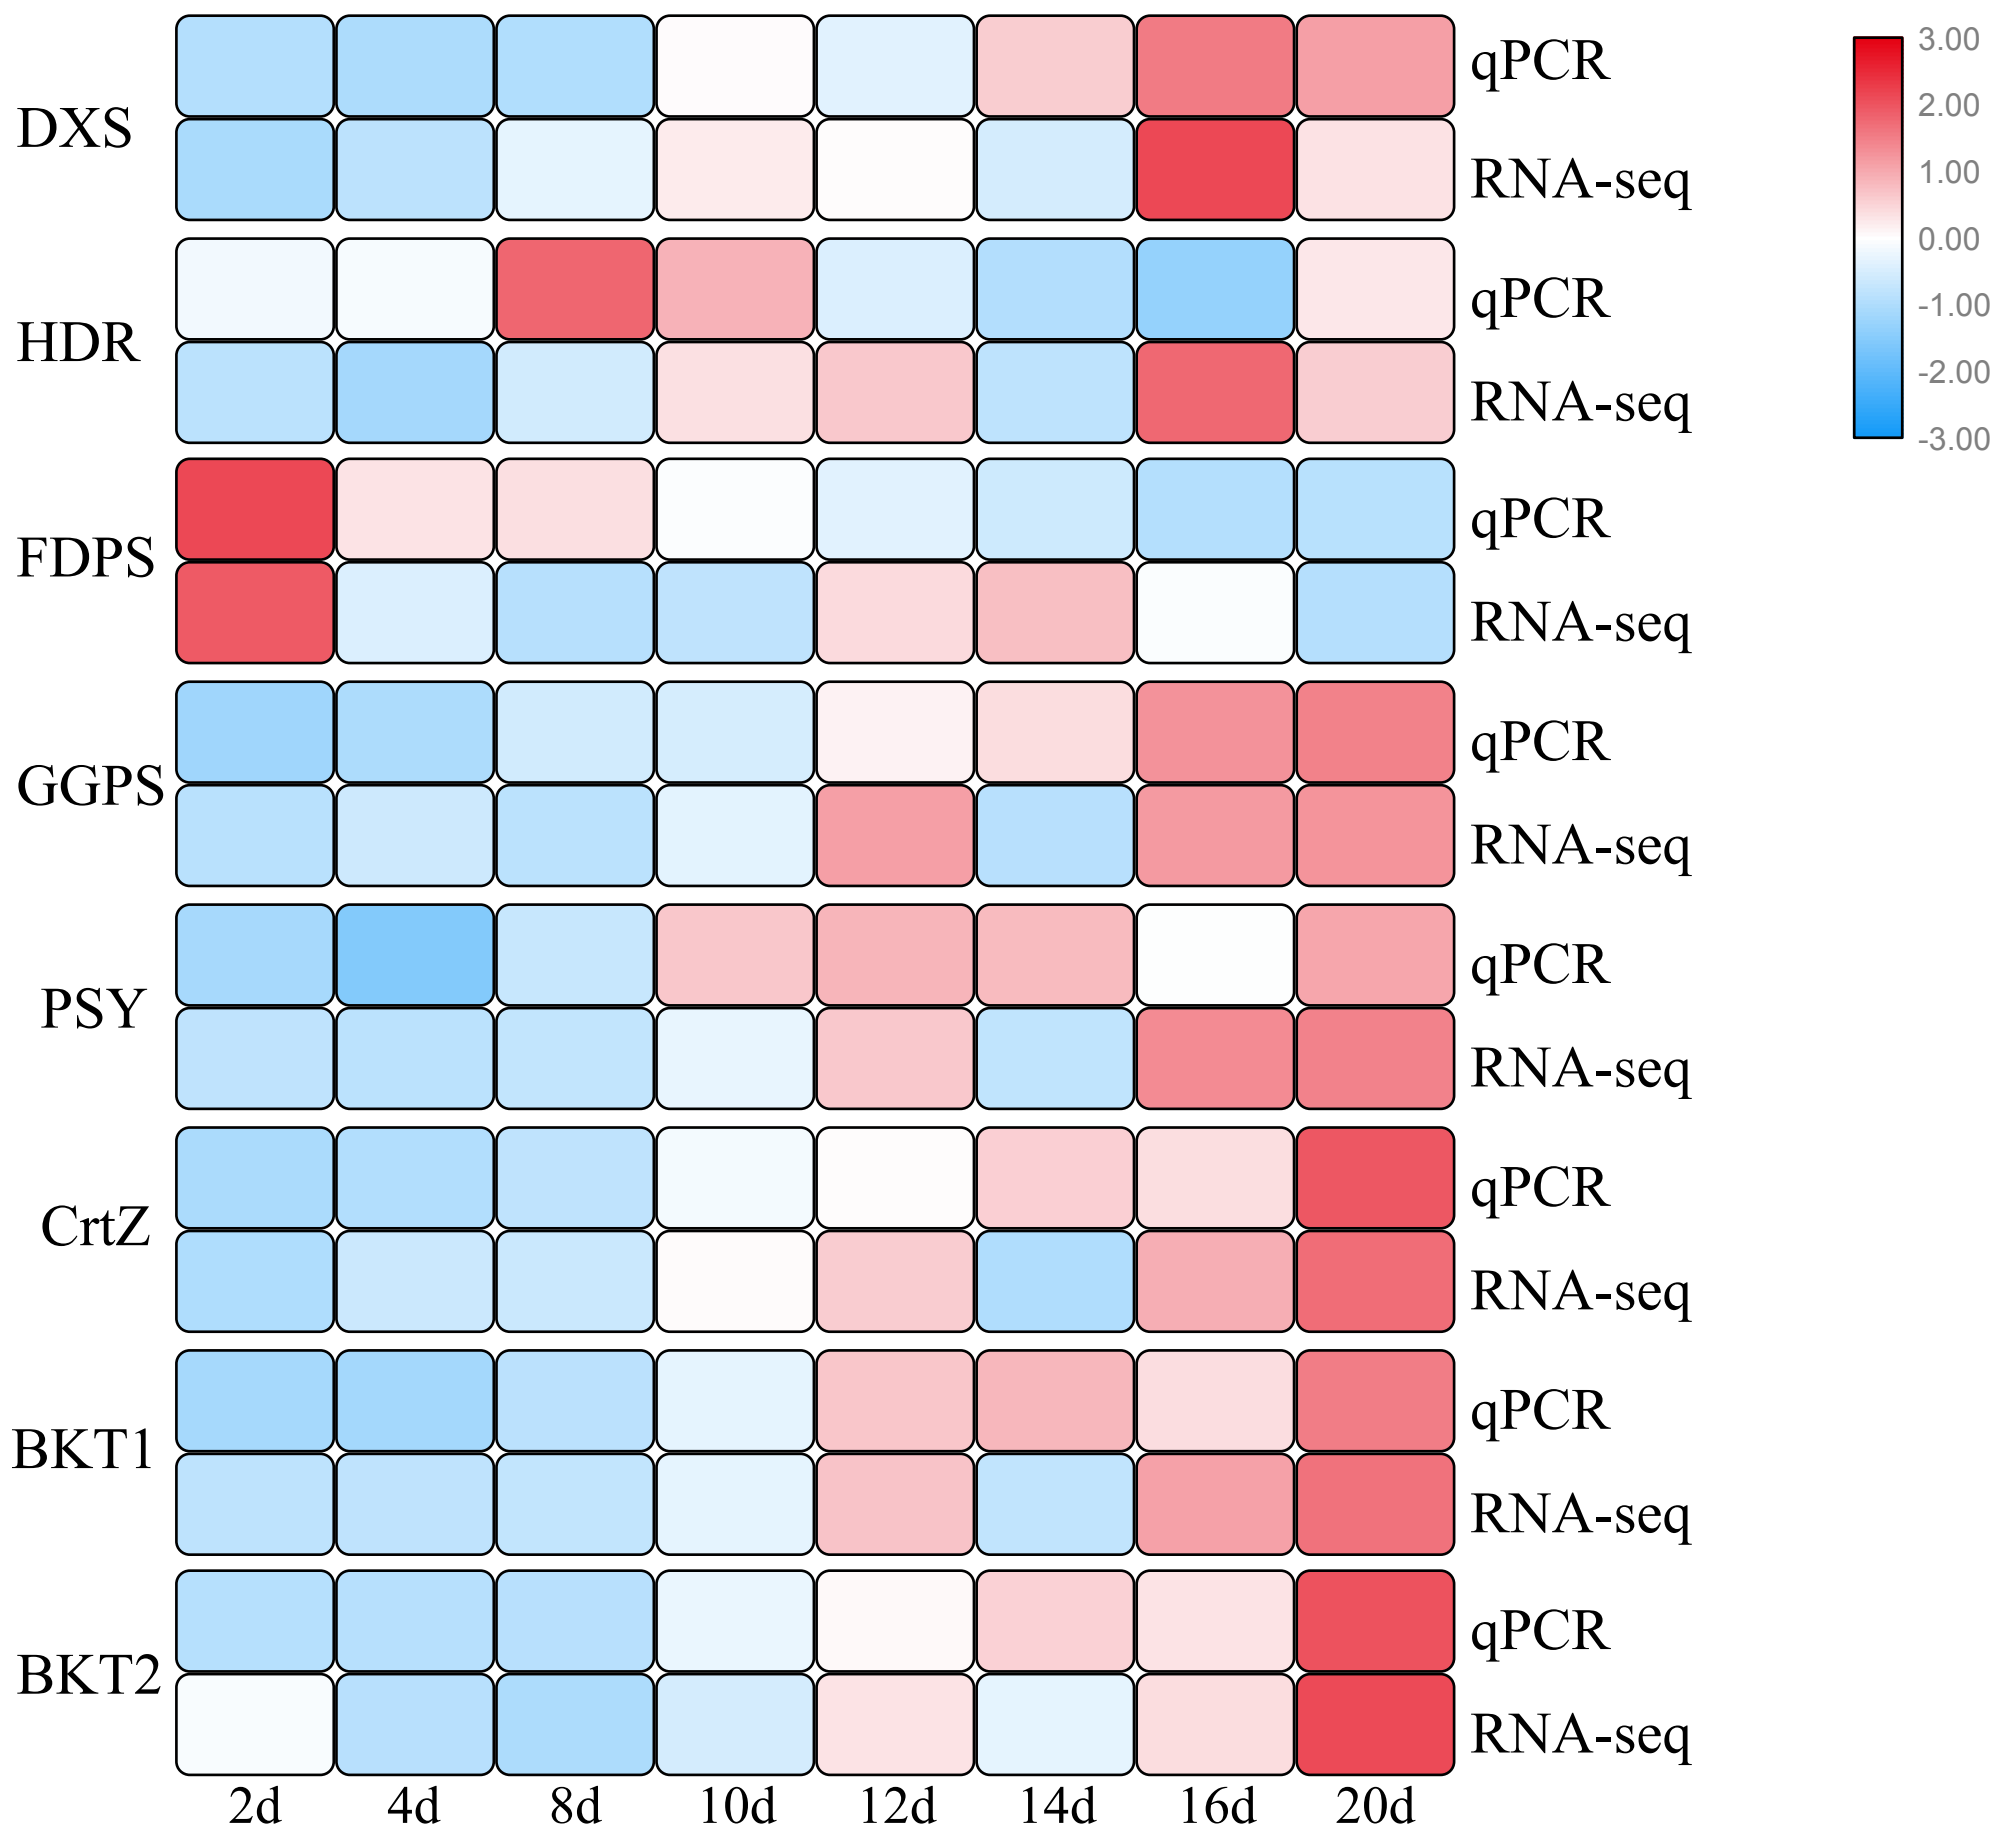

Supplement: 13068_2019_1355_MOESM7_ESM.pdf [file 13068_2019_1355_MOESM7_ESM.pdf]
